# Supplementary material for: Distribution, ecological risk assessment and source identification of pollutants in soils of different land-use types in degraded wetlands
Source: PeerJ. 2022 Feb 22;10:e12885. doi: 10.7717/peerj.12885 (PMC8877397; doi:10.7717/peerj.12885)
Supplement: Supplemental Information 1 [file peerj-10-12885-s001.xlsx]

## Sheet: Sheet1
site	Pb	Cd	Zn	Cu	Cr	Ni	As	Hg	TN	TP	OM	pH
	mg/kg	mg/kg	mg/kg	mg/kg	mg/kg	mg/kg	mg/kg	mg/kg	g/kg	g/kg	g/kg
N1	52.1	0.11	120	44	68	56	9.46	0.093	2.27	0.98	35.4	8.58
N2	54.1	0.12	115	48	71	57	9	0.073	2.75	0.84	45	8.63
N3	25.4	0.06	90	43	78	52	10.7	0.038	1.46	0.73	21.1	8.67
N4	53.4	0.1	94	39	42	52	13.1	0.076	1.53	0.79	24.8	8.64
N5	54.7	0.11	98	41	44	52	12.9	0.054	1.62	0.83	28.4	8.79
N6	50.4	0.13	110	54	46	53	14	0.053	2.69	1.32	44.2	8.25
N7	41.8	0.07	75	29	41	41	8.1	0.084	1.61	0.69	24.2	8.6
N8	60.2	0.13	100	54	51	56	15.8	0.033	1.7	0.98	24.6	8.5
N9	55.8	0.1	92	41	49	55	12.2	0.036	1.89	1.04	27.1	8.3
N10	44.6	0.05	68	29	45	46	5.16	0.012	2.22	0.74	33.8	8.73
H1	37.3	0.06	58	20	43	35	4.2	0.013	3.06	0.81	46.3	8.3
H2	30.6	0.01	47	16	51	32	5.05	0.014	0.73	0.77	10.9	8.62
H3	42.6	0.02	85	32	54	51	9.15	0.011	1.22	0.93	17.6	8.57
H4	43.7	0.01	64	40	47	44	8.5	0.007	0.75	1.13	10.9	8.76
H5	45.6	0.02	81	44	43	66	10.2	0.029	1.63	0.74	23.4	8.53
H6	50.4	0.1	106	49	56	58	11	0.044	2.21	1.1	31.8	8.41
D1	49.6	0.04	87	32	51	46	8.18	0.062	2.87	0.99	48.3	8.58
D2	40.8	0.1	88	35	46	44	8.8	0.091	4.78	1.02	77	8.54
D3	44.5	0.08	82	37	42	49	8.4	0.012	2.98	0.89	56.7	8.52
D4	40.8	0.12	88	35	44	45	8.65	0.023	4.73	1	72.4	8.39
D5	39.6	0.08	87	38	47	51	9.43	0.025	4.21	0.94	61.5	8.47
D6	40.4	0.11	98	42	45	51	9.81	0.027	3.89	0.85	55.7	8.53
D7	42.3	0.1	97	38	48	47	7.32	0.021	4.09	0.99	58.5	8.48
D8	44.9	0.1	91	40	44	48	8.22	0.022	4.22	1	60.4	8.55
D9	43.9	0.04	81	34	48	50	9.86	0.018	3.5	0.71	55	8.74
