# Supplementary material for: Distribution, ecological risk assessment and source identification of pollutants in soils of different land-use types in degraded wetlands
Source: PeerJ. 2022 Feb 22;10:e12885. doi: 10.7717/peerj.12885 (PMC8877397; doi:10.7717/peerj.12885)
Supplement: Supplemental Information 3 [file peerj-10-12885-s003.docx]

**Table S1** Classification of Nemerow pollution index

| **Degree** | ***P*TN** | ***P*TP** | ***Pn*** | **Level** |
| --- | --- | --- | --- | --- |
| 1 | *P*TN≤1.0 | *P*TP≤0.70 | *Pn*≤0.70 | Clean |
| 2 | 1.0＜*P*TN≤2.0 | 0.7＜*P*TP≤1.0 | 0.7＜*Pn*≤1.0 | General clean |
| 3 | 2.0＜*P*TN≤3.0 | 1.0＜*P*TP≤2.0 | 1.0＜*Pn*≤2.0 | Light pollution |
| 4 | 3.0＜*P*TN≤5.0 | 2.0＜*P*TP≤3.0 | 2.0＜*Pn*≤3.0 | Moderate pollution |
| 5 | *P*TN＞5.0 | *P*TP＞3.0 | *Pn*＞3.0 | Heavy pollution |
